# Supplementary material
Source: PubMed Central journal article supplement (PMC7980767)
Supplement: kaaa050_suppl_supplementary_tables.pdf [file kaaa050_suppl_supplementary_tables.pdf]

### Supplemental Tables

**Table 1b: Participant Characteristics (Complete Data at Both Visit 1 and 3)**

|                                              | Overall     | By Sex      |             |                      | By Age     |            |            | p-value <sup>2</sup> |
|----------------------------------------------|-------------|-------------|-------------|----------------------|------------|------------|------------|----------------------|
|                                              |             | Females     | Males       | p-value <sup>1</sup> | 21-44      | 45-64      | 65+        |                      |
| <b>N</b>                                     | 2711        | 1730        | 981         |                      | 759        | 1473       | 479        |                      |
| <b>Demographics</b>                          |             |             |             |                      |            |            |            |                      |
| Age, Mean (SD)                               | 53.2 (12.1) | 53.6 (12.2) | 52.5 (11.8) | <b>0.0249</b>        | 38.5 (5.6) | 55.1 (5.9) | 70.5 (4.4) | <b>&lt;.0001</b>     |
| Sex (% Female)                               | 63.8        | -           | -           | -                    | 63.2       | 62.6       | 68.5       | 0.0618               |
| <b>SES/Lifestyle factors</b>                 |             |             |             |                      |            |            |            |                      |
| Education (%)                                |             |             |             |                      |            |            |            |                      |
| < High School                                | 12.3        | 11.9        | 13.1        | 0.2725               | 3.3        | 10.2       | 33.2       | <b>&lt;.0001</b>     |
| High School 4 – College 3                    | 48.7        | 49.9        | 46.7        |                      | 58.5       | 47.2       | 38.0       |                      |
| College 4+                                   | 38.9        | 38.2        | 40.2        |                      | 38.2       | 42.6       | 28.8       |                      |
| Income (%)                                   |             |             |             |                      |            |            |            |                      |
| Poor                                         | 11.1        | 13.6        | 6.6         | <b>&lt;.0001</b>     | 14.2       | 8.4        | 14.1       | <b>&lt;.0001</b>     |
| Lower-middle                                 | 21.4        | 23.8        | 17.3        |                      | 18.7       | 18.2       | 35.5       |                      |
| Upper-middle                                 | 31.2        | 32.6        | 28.7        |                      | 38.5       | 29.4       | 24.8       |                      |
| Affluent                                     | 36.4        | 30.1        | 47.4        |                      | 28.6       | 44.0       | 25.6       |                      |
| Cigarette smoking (AHA categorization) (%)   |             |             |             |                      |            |            |            |                      |
| Never smoked/quit ≥ 12 month ago             | 87.7        | 90.1        | 83.4        | <b>&lt;.0001</b>     | 87.0       | 86.6       | 92.3       | <b>0.0071</b>        |
| Quit < 12 month ago                          | 0.6         | 0.5         | 0.8         |                      | 1.1        | 0.5        | 0.4        |                      |
| Current smoker                               | 11.7        | 9.4         | 15.8        |                      | 12.0       | 13.0       | 7.3        |                      |
| Alcohol consumption                          |             |             |             |                      |            |            |            |                      |
| Alcohol drinking in the past 12 months (%)   | 50.1        | 42.9        | 62.7        | <b>&lt;.0001</b>     | 61.6       | 50.4       | 30.7       | <b>&lt;.0001</b>     |
| Average number of drinks per week, Mean (SD) | 1.7 (5.8)   | 0.7 (3.0)   | 3.6 (8.6)   | <b>&lt;.0001</b>     | 2.3 (7.3)  | 1.7 (5.5)  | 0.9 (3.8)  | <b>0.0002</b>        |
| Nutrition (AHA categorization) (%)           |             |             |             |                      |            |            |            |                      |
| Ideal health                                 | 0.8         | 0.9         | 0.6         | 0.0822               | 0.2        | 0.8        | 1.8        | <b>&lt;.0001</b>     |
| Intermediate health                          | 38.6        | 40.0        | 36.1        |                      | 28.7       | 41.3       | 45.5       |                      |
| Poor health                                  | 60.6        | 59.0        | 63.4        |                      | 71.2       | 57.9       | 52.7       |                      |
| Physical Activity (AHA categorization) (%)   |             |             |             |                      |            |            |            |                      |
| Ideal health                                 | 21.9        | 19.3        | 26.3        | <b>0.0001</b>        | 25.2       | 22.1       | 15.9       | <b>&lt;.0001</b>     |
| Intermediate health                          | 34.2        | 35.6        | 31.6        |                      | 38.9       | 33.4       | 29.2       |                      |
| Poor health                                  | 44.0        | 45.1        | 42.0        |                      | 36.0       | 44.5       | 54.9       |                      |

|                                   |                   |                   |                   |                  |                   |                   |                   |                     |
|-----------------------------------|-------------------|-------------------|-------------------|------------------|-------------------|-------------------|-------------------|---------------------|
| <b>Discrimination, Mean (SD)</b>  |                   |                   |                   |                  |                   |                   |                   |                     |
| Everyday discrimination           | 2.11 (0.99)       | 2.04 (1.00)       | 2.17 (1.06)       | <b>0.0004</b>    | 2.31 (1.01)       | 2.13 (1.00)       | 1.77 (0.81)       | <b>&lt;.0001</b>    |
| Median (IQR)                      | 1.89 (1.33, 2.67) | 1.89 (1.33, 2.56) | 2.00 (1.44, 2.78) |                  | 2.11 (1.56, 2.89) | 1.89 (1.33, 2.67) | 1.56 (1.11, 2.06) |                     |
| Lifetime discrimination           | 3.10 (2.09)       | 2.86 (2.09)       | 3.24 (2.16)       | <b>&lt;.0001</b> | 3.13 (2.03)       | 3.28 (2.11)       | 2.49 (2.02)       | <b>&lt;.0001</b>    |
| Median (IQR)                      | 3 (1, 5)          | 3 (1, 4)          | 3 (2, 5)          |                  | 3 (2, 5)          | 3 (2, 5)          | 2 (1, 4)          |                     |
| Discrimination burden             | 2.34 (0.76)       | 2.31 (0.77)       | 2.36 (0.76)       | 0.0707           | 2.20 (0.72)       | 2.39 (0.76)       | 2.37 (0.79)       | <b>&lt;.0001</b>    |
| Median (IQR)                      | 2.17 (1.83, 2.83) | 2.17 (1.83, 2.83) | 2.33 (1.83, 2.83) |                  | 2.17 (1.67, 2.83) | 2.33 (1.83, 2.83) | 2.33 (1.67, 2.83) |                     |
| <b>Health Measures, Mean (SD)</b> |                   |                   |                   |                  |                   |                   |                   |                     |
| BMI                               | 31.2 (7.0)        | 32.3 (7.4)        | 29.4 (5.9)        | <b>&lt;.0001</b> | 31.9 (7.8)        | 31.2 (6.9)        | 30.1 (5.8)        | <b>&lt;.0001</b>    |
| Waist Circumference               | 98.5 (15.7)       | 98.1 (16.1)       | 99.4 (14.9)       | <b>0.0333</b>    | 97.4 (17.3)       | 98.9 (15.3)       | 99.2 (14.0)       | 0.0622              |
| SBP                               | 125.4 (15.7)      | 124.4 (15.6)      | 127.2 (15.6)      | <b>&lt;.0001</b> | 118.5 (12.8)      | 126.3 (14.9)      | 133.6 (17.3)      | <b>&lt;.0001</b>    |
| DBP                               | 76.1 (8.5)        | 74.6 (8.1)        | 78.8 (8.5)        | <b>&lt;.0001</b> | 75.9 (8.5)        | 77.1 (8.2)        | 73.6 (8.8)        | <b>&lt;.0001</b>    |
| Triglycerides                     | 98.0 (55.9)       | 93.9 (50.1)       | 105.3 (64.3)      | <b>&lt;.0001</b> | 87.7 (60.9)       | 101.6 (54.8)      | 103.1 (48.5)      | <b>&lt;.0001</b>    |
| HDL                               | 52.3 (14.5)       | 55.5 (14.5)       | 46.6 (12.5)       | <b>&lt;.0001</b> | 50.1 (13.0)       | 52.3 (14.4)       | 55.6 (16.1)       | <b>&lt;.0001</b>    |
| Glucose                           | 90.2 (8.8)        | 89.6 (8.9)        | 91.1 (8.5)        | <b>&lt;.0001</b> | 86.6 (7.5)        | 91.0 (8.8)        | 93.4 (8.9)        | <b>&lt;.0001</b>    |
| Cortisol                          | 9.4 (3.9)         | 8.7 (3.6)         | 10.7 (3.9)        | <b>&lt;.0001</b> | 9.0 (4.1)         | 9.4 (3.8)         | 10.0 (3.6)        | <b>&lt;.0001</b>    |
| hsCRP                             | 0.46 (0.68)       | 0.6 (0.7)         | 0.3 (0.5)         | <b>&lt;.0001</b> | 0.4 (0.7)         | 0.5 (0.7)         | 0.5 (0.6)         | 0.2946 <sup>3</sup> |
| ATP-III MetS Status (%)           | 20.6              | 22.3              | 17.6              | <b>0.0043</b>    | 12.5              | 22.2              | 28.4              | <b>&lt;.0001</b>    |
| MetS severity score Z-score       | -0.08 (0.71)      | -0.08 (0.73)      | -0.09 (0.68)      | 0.7980           | -0.27 (0.75)      | -0.03 (0.69)      | 0.06 (0.67)       | <b>&lt;.0001</b>    |

<sup>1</sup> t-test for continuous variables, chi-square tests for categorical variables

<sup>2</sup> ANOVA for continuous variables, chi-square tests for categorical variables

<sup>3</sup> P=0.0012 by Kruskal-Wallis test



Model 1 covariates: Individual discrimination score (by tertile), age, sex; Model 2 covariates: Model 1 covariates + education (<hs/hs-some college/college graduate); Model 3 covariates: Model 2 covariates + nutrition (poor health/other), physical activity (poor/intermediate/ideal health), smoking status (current smoker/other), alcohol consumption (number of drinks per week)

**Table 3b: Linear Mixed Models on MetS Severity by Age (Model 3, Complete Data at Both Visit 1 and Visit 3)**

| 21 - 44 Year                           |         |                        |                        |                             | 45 - 64 Year             |                        |                      |                        |                             | 65+ Year                 |                        |                        |                        |                             |                         |
|----------------------------------------|---------|------------------------|------------------------|-----------------------------|--------------------------|------------------------|----------------------|------------------------|-----------------------------|--------------------------|------------------------|------------------------|------------------------|-----------------------------|-------------------------|
| Mean Z-score<br>(95% CI)               |         |                        | p-value                |                             | Mean Z-score<br>(95% CI) |                        |                      | p-value                |                             | Mean Z-score<br>(95% CI) |                        | p-value                |                        | p-value                     |                         |
| N                                      | Visit 1 | Visit 3                | Disc<br>Main<br>Effect | Disc x Visit<br>Interaction | N                        | Visit 1                | Visit 3              | Disc<br>Main<br>Effect | Disc x Visit<br>Interaction | N                        | Visit 1                | Visit 3                | Disc<br>Main<br>Effect | Disc x Visit<br>Interaction | Age*disc<br>Interaction |
| <b>Everyday Discrimination Tertile</b> |         |                        |                        |                             | 0.6915                   | 0.5860                 |                      | 0.1105                 | 0.5912                      |                          | 0.6054                 | 0.1882                 | <b>&lt;.0001</b>       |                             |                         |
| Low                                    | 356     | -0.12<br>(-0.29, 0.05) | 0.28<br>(0.09, 0.46)   |                             | 912                      | -0.06<br>(-0.15, 0.02) | 0.11<br>(0.01, 0.21) |                        |                             | 428                      | -0.16<br>(-0.32, 0.00) | -0.13<br>(-0.29, 0.04) |                        |                             |                         |
| Med                                    | 522     | -0.16<br>(-0.32,-0.00) | 0.20<br>(0.03, 0.37)   |                             | 1028                     | -0.03<br>(-0.11, 0.06) | 0.17<br>(0.08, 0.27) |                        |                             | 344                      | -0.13<br>(-0.29, 0.03) | -0.17<br>(-0.34, 0.00) |                        |                             |                         |
| High                                   | 618     | -0.15<br>(-0.30, 0.00) | 0.19<br>(0.03, 0.35)   |                             | 950                      | 0.02<br>(-0.06, 0.10)  | 0.24<br>(0.14, 0.33) |                        |                             | 172                      | -0.11<br>(-0.30, 0.08) | -0.02<br>(-0.23, 0.19) |                        |                             |                         |
| <b>Lifetime Discrimination Tertile</b> |         |                        |                        |                             | 0.7331                   | 0.4567                 |                      | <b>0.0028</b>          | 0.6199                      |                          | 0.4878                 | 0.6170                 | <b>&lt;.0001</b>       |                             |                         |
| Low                                    | 608     | -0.13<br>(-0.29, 0.03) | 0.22<br>(0.06, 0.39)   |                             | 1084                     | -0.08<br>(-0.17, 0.00) | 0.10<br>(0.01, 0.19) |                        |                             | 510                      | -0.13<br>(-0.28, 0.02) | -0.14<br>(-0.30, 0.02) |                        |                             |                         |
| Med                                    | 472     | -0.15<br>(-0.31, 0.01) | 0.25<br>(0.08, 0.42)   |                             | 950                      | 0.05<br>(-0.03, 0.14)  | 0.28<br>(0.18, 0.37) |                        |                             | 252                      | -0.07<br>(-0.24, 0.10) | -0.03<br>(-0.22, 0.16) |                        |                             |                         |
| High                                   | 394     | -0.17<br>(-0.34, 0.00) | 0.16<br>(-0.03, 0.34)  |                             | 798                      | 0.02<br>(-0.07, 0.11)  | 0.21<br>(0.11, 0.32) |                        |                             | 162                      | -0.17<br>(-0.37, 0.04) | -0.12<br>(-0.34, 0.11) |                        |                             |                         |
| <b>Discrimination Burden Tertile</b>   |         |                        |                        |                             | 0.8326                   | 0.5545                 |                      | 0.5055                 | 0.2547                      |                          | 0.1930                 | <b>0.0487</b>          | <b>&lt;.0001</b>       |                             |                         |
| Low                                    | 548     | -0.16<br>(-0.33, 0.01) | 0.21<br>(0.03, 0.39)   |                             | 772                      | -0.06<br>(-0.15, 0.04) | 0.20<br>(0.10, 0.31) |                        |                             | 238                      | -0.01<br>(-0.20, 0.18) | -0.11<br>(-0.31, 0.08) |                        |                             |                         |
| Med                                    | 412     | -0.10<br>(-0.28, 0.08) | 0.23<br>(0.04, 0.42)   |                             | 832                      | 0.03<br>(-0.06, 0.12)  | 0.21<br>(0.11, 0.32) |                        |                             | 250                      | -0.15<br>(-0.32, 0.02) | -0.12<br>(-0.31, 0.06) |                        |                             |                         |
| High                                   | 346     | -0.17<br>(-0.34, 0.00) | 0.22<br>(0.03, 0.41)   |                             | 900                      | 0.03<br>(-0.06, 0.12)  | 0.23<br>(0.12, 0.33) |                        |                             | 250                      | 0.00<br>(-0.19, 0.19)  | 0.05<br>(-0.15, 0.25)  |                        |                             |                         |

Low=first tertile; median=second tertile; high=third tertile

Model 3 covariates: Individual discrimination score (by tertile), sex, education (<hs/hs-some college/college graduate), nutrition (poor health/other), physical activity (poor/intermediate/ideal health), smoking status (current smoker/other), alcohol consumption (number of drinks per week)

**Table 4b: Linear Mixed Models on MetS Severity by Sex (Model 3, Complete Data at Both Visit 1 and Visit 3)**

|                                        | Female                   |                         |                      |                     |                             | Male                     |                         |                       |                     |                             |         |
|----------------------------------------|--------------------------|-------------------------|----------------------|---------------------|-----------------------------|--------------------------|-------------------------|-----------------------|---------------------|-----------------------------|---------|
|                                        | Mean Z-score<br>(95% CI) |                         |                      | p-value             |                             | Mean Z-score<br>(95% CI) |                         |                       | p-value             |                             | p-value |
|                                        | N                        | Visit 1                 | Visit 3              | Disc Main<br>Effect | Disc x Visit<br>Interaction | N                        | Visit 1                 | Visit 3               | Disc Main<br>Effect | Disc x Visit<br>Interaction |         |
| <b>Everyday Discrimination Tertile</b> |                          |                         |                      | <b>0.0377</b>       | 0.1792                      |                          |                         |                       | 0.7692              | 0.4646                      | 0.9684  |
| Low                                    | 1140                     | -0.12<br>(-0.20, -0.03) | 0.09<br>(0.00, 0.18) |                     |                             | 556                      | -0.10<br>(-0.20, 0.01)  | 0.03<br>(-0.09, 0.16) |                     |                             |         |
| Med                                    | 1234                     | -0.08<br>(-0.16, 0.00)  | 0.14<br>(0.05, 0.23) |                     |                             | 660                      | -0.12<br>(-0.22, -0.02) | 0.05<br>(-0.06, 0.16) |                     |                             |         |
| High                                   | 1028                     | -0.04<br>(-0.12, 0.05)  | 0.24<br>(0.15, 0.34) |                     |                             | 712                      | -0.09<br>(-0.19, 0.01)  | 0.10<br>(-0.01, 0.21) |                     |                             |         |
| <b>Lifetime Discrimination Tertile</b> |                          |                         |                      | <b>0.0009</b>       | 0.0990                      |                          |                         |                       | 0.4795              | 0.7726                      | 0.1437  |
| Low                                    | 1510                     | -0.11<br>(-0.19, -0.03) | 0.09<br>(0.00, 0.18) |                     |                             | 692                      | -0.12<br>(-0.21, -0.02) | 0.03<br>(-0.08, 0.14) |                     |                             |         |
| Med                                    | 1062                     | 0.00<br>(-0.08, 0.09)   | 0.29<br>(0.19, 0.38) |                     |                             | 612                      | -0.07<br>(-0.18, 0.03)  | 0.10<br>(-0.02, 0.22) |                     |                             |         |
| High                                   | 770                      | -0.08<br>(-0.18, 0.01)  | 0.15<br>(0.04, 0.25) |                     |                             | 584                      | -0.06<br>(-0.17, 0.05)  | 0.12<br>(0.00, 0.25)  |                     |                             |         |
| <b>Discrimination Burden Tertile</b>   |                          |                         |                      | 0.3598              | 0.5738                      |                          |                         |                       | 0.6434              | 0.7761                      | 0.2725  |
| Low                                    | 1026                     | -0.10<br>(-0.19, -0.01) | 0.16<br>(0.06, 0.26) |                     |                             | 532                      | -0.07<br>(-0.18, 0.04)  | 0.13<br>(0.00, 0.26)  |                     |                             |         |
| Med                                    | 944                      | -0.03<br>(-0.12, 0.06)  | 0.19<br>(0.09, 0.29) |                     |                             | 550                      | -0.10<br>(-0.21, 0.00)  | 0.06<br>(-0.07, 0.18) |                     |                             |         |
| High                                   | 914                      | -0.03<br>(-0.12, 0.06)  | 0.21<br>(0.11, 0.31) |                     |                             | 582                      | -0.06<br>(-0.17, 0.05)  | 0.11<br>(-0.01, 0.24) |                     |                             |         |

Low=first tertile; median=second tertile; high=third tertile

Model 3 covariates: Individual discrimination score (by tertile), age, education (<hs/hs-some college/college graduate), nutrition (poor health/other), physical activity (poor/intermediate/ideal health), smoking status (current smoker/other), alcohol consumption (number of drinks per week)
